# Supplementary material
Source: PubMed Central journal article supplement (PMC3142614)
Supplement: NIHMS307074-supplement-sfig2.pdf [file NIHMS307074-supplement-sfig2.pdf]

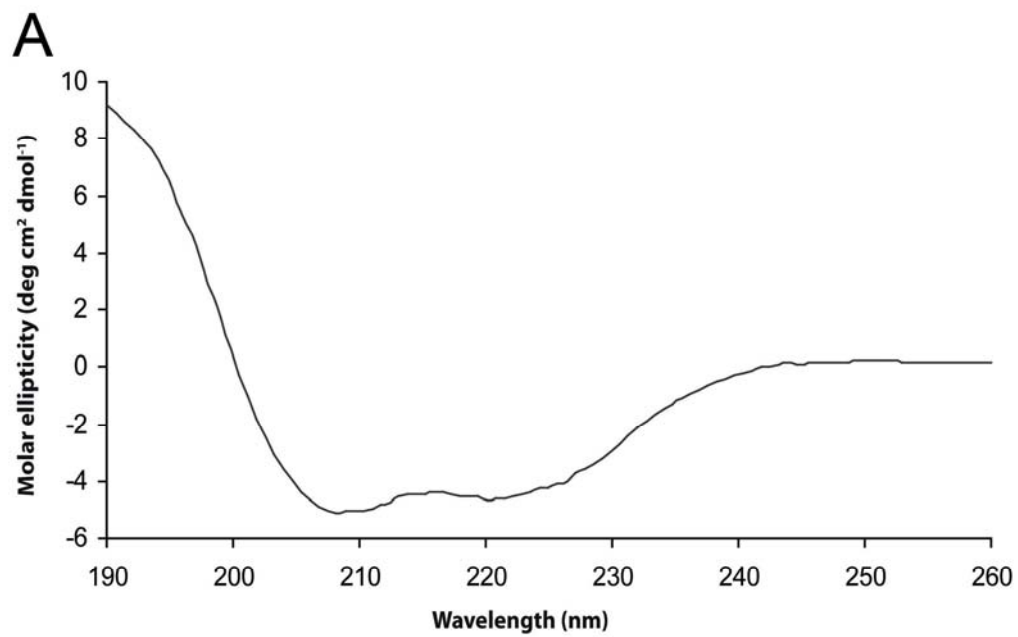

**B**

|          | $\alpha$ -Helix | $\beta$ -Sheet | Turn  | Random coil |
|----------|-----------------|----------------|-------|-------------|
| ContinII | 55.7%           | 5.4%           | 15.8% | 23.1%       |
| Selcon3  | 56.6%           | 10.2%          | 8.0%  | 24.0%       |
| CDSSTR   | 52.4%           | 22.9%          | 9.8%  | 14.3%       |

**Supplementary Fig. 2.** CD analysis of purified AvrM-A. **A**, CD spectrum of AvrM-A (4  $\mu$ M) in 10 mM phosphate buffer pH 8.0. **B**, The percentage of  $\alpha$ -helix,  $\beta$ -sheet and random coil calculated from analysis of the spectrum by the CD analysis programs ContinII, Selcon3 and CDSSTR.
