# Supplementary material
Source: PubMed Central journal article supplement (PMC3142614)
Supplement: NIHMS307074-supplement-stab1.pdf [file NIHMS307074-supplement-stab1.pdf]

**Supplementary Table 1.** Oligonucleotide primers used for AvrM and avrM amplification

| <b>Primer name</b>                          | <b>Primer sequence</b>         |
|---------------------------------------------|--------------------------------|
| GwF AvrM-A $\Delta$ 28 & avrM $\Delta$ 28   | CACCATGCACCCCATGAACTCAGCAA     |
| GwF AvrM-A $\Delta$ 107 & avrM $\Delta$ 45  | CACCATGCAACCAGAATTTGACAGAGG    |
| GwF AvrM-A $\Delta$ 170                     | CACCATGGAAATCAAACAAACGTACGAC   |
| GwF avrM $\Delta$ 108                       | CACCATGGAAATCAAACAAAAGTACGACAA |
| GwF AvrM-A $\Delta$ 189 & avrM $\Delta$ 127 | CACCATGCTGGTCTCGGAAGAATCACT    |
| GwF AvrM-A $\Delta$ 196                     | CACCATGACACGAGACGCGCTCTTGAA    |
| GwF avrM $\Delta$ 134                       | CACCATGACACGAGACGCGCTCTTGG     |
| GwF AvrM-A $\Delta$ 206 & avrM $\Delta$ 144 | CACCATGGAGCAATATGTAGAAAAAGCAG  |
| GwF AvrM-A $\Delta$ 216 & avrM $\Delta$ 154 | CACCATGGACAAAGATGTGTATCGAAACA  |
| GwF AvrM-A $\Delta$ 225                     | CACCATGAAGAGGCAAACCTTATGAAAACT |
| GwF avrM $\Delta$ 163                       | CACCATGCAGAGGCAAACCTTATGAAAGAC |
| R AvrM-A                                    | TCACATGTCTGGAGATTTCA           |
| R avrM                                      | TCAAGGTTTTGCTAATGATTTG         |
| R AvrM-A CT $\Delta$ 8                      | TCAGTTGCGTTTGAATAGTTTATC       |
| R AvrM-A CT $\Delta$ 16                     | TCAACCTTTCAAAGCTTCTTTTCAT      |
| R AvrM-A CT $\Delta$ 32                     | TCACTTGATCTCAGCCTTATACA        |
| R avrM CT $\Delta$ 34                       | TCACATGTCTGGAGATTTCAATATC      |
